# Supplementary material for: Sucrosomial® Iron: A New Generation Iron for Improving Oral Supplementation
Source: Pharmaceuticals (Basel). 2018 Oct 4;11(4):97. doi: 10.3390/ph11040097 (PMC6316120; doi:10.3390/ph11040097)
Supplement: Supplementary file 1 [file pharmaceuticals-11-00097-s001.pdf]

**Table S1.** Sucrosomial iron (SI) administration in oncologic patients (10 studies, 241 patients)

| Author<br>(year) [ref]<br>Study type            | Patients                                                  | Treatment<br>Compound (Dose)<br>Duration                               | Baseline<br>Hb<br>(g/dL) | Final<br>Hb<br>(g/dL) | Baseline<br>Ferritin<br>(ng/mL) | Final<br>Ferritin<br>(ng/mL) | Baseline<br>TSAT<br>(%) | Final<br>TSAT<br>(%) | GI<br>side<br>effects                |
|-------------------------------------------------|-----------------------------------------------------------|------------------------------------------------------------------------|--------------------------|-----------------------|---------------------------------|------------------------------|-------------------------|----------------------|--------------------------------------|
| Renso et al<br>(2015) [1]<br>Case series        | 12 patients with<br>lymphoproliferati-<br>ve disease      | SI (30 mg/day) +DEPO 150 mcg/w<br>Chemotherapy<br>2 months             | 10.1                     | 10.9                  | ---                             | ---                          | ---                     | ----                 | 4%                                   |
| Petrungaro et al.<br>(2015) [2]<br>Case series  | 10 patients with<br>lymphoma (4<br>HL,6NHL)               | SI (30 mg/day)<br>After chemotherapy<br>2 months                       | 10.0                     | 11.2<br>(↑QoL)        | 43                              | 93                           | ---                     | ---                  | ---                                  |
| Grillone et al.<br>(2016) [3]<br>Case series    | 30 patients with<br>solid tumors                          | SI (30 mg/day)<br>Chemotherapy<br>2 months*                            | 11.2                     | 11.3                  |                                 |                              |                         |                      | 10%                                  |
| Romano et al.<br>(2016) [4]<br>Case series      | 25 Hodgkin<br>lymphoma ≥2B                                | SI (30 mg/day)<br>Chemotherapy<br>End of treatment**                   | 10.2                     | 12.8                  | 90                              | 277                          | 14.3                    | 35.9                 | No                                   |
| Barni et al.<br>(2017) [5]<br>Case series       | 16 patients with<br>solid tumor                           | SI (30 mg/day)<br>Palliative chemotherapy<br>3 months**                | 11.2                     | 10.9                  | ---                             | ---                          | 13.5                    | 20.6                 | No                                   |
| Sabbatini et al<br>(2017) [6]<br>Case series    | 30 patients with<br>solid tumors                          | SI (30 mg/day) (n=15)<br>SI (60 mg/day) (n=15)<br>3 months**           | 10.5<br>9.8              | 12.0<br>12.0          | ---                             | ---                          | ---                     | ---                  | Some<br>dyspepsia<br>and<br>diarrhea |
| Poyato et al.<br>(2017) [7]<br>Case series      | 9 patients with<br>solid tumors                           | SI (30 mg/day)<br>Chemotherapy<br>2 months***                          | 9.8                      | 10.7                  | ---                             | ---                          | ---                     | ---                  | 11%                                  |
| Monari et al<br>(2016) [8]<br>Observational     | 15 Advanced<br>prostate cancer<br>with bone<br>metastases | SI (30mg/day) (n=7)<br>No iron (n=8)<br>Chemo-radiotherapy<br>6 months | 11.1<br>10.9             | 12.2<br>9.7           | ---                             | ---                          | ---                     | ---                  | --<br>Well<br>tolerated              |
| Barragans et al.<br>(2016) [9]<br>RCT pilot     | 15 patients with<br>peritoneal<br>carcinomatosis          | SI (30mg/day) (n=8)<br>FS (80 mg/day) (n=7)<br>3 months                | 10.4<br>9.5              | 12.5<br>11.9          | 529<br>1048                     | ---                          | 10<br>8                 | ---                  | 25% mild<br>29% mild                 |
| Barzaghi et al.<br>(2016) [10]<br>Observational | 15 patients<br>advanced rectal<br>cancer & bleeding       | SI (30 mg/day) (n=11)<br>FH (?) +folic acid<br>14 days                 | 8.0                      | 11.6<br>11.4          | 100                             | ---                          | 25                      | ---                  | No                                   |

\*2 patients started ESA; \*\*No ESA or blood transfusion during study period, 70% reached delta Hb ≥2 g/dL or Hb ≥12 g/dL; \*\*\* one patient transfused. DEPO, darbepoetin; ESA, erythropoiesis stimulating agent; FH, ferrum Haussman?; GI, gastrointestinal; QoL, quality of life; TSAT, transferrin saturation.

## References:

1. Renso R, Bolis S, Casaroli I, et al. Use of darbopoietin and oral liposomal iron (Sideral Forte) in chemotherapy associated anemia in patients with lymphoproliferative disease. Expert Review of Hematology, 2015; 8 (Suppl 1):S24
2. Petrungaro A, Mineo G, Cingari R, et al. Benefits assessment of liposomal iron (Sideral® Forte) administration to hematologic patients in follow-up after chemotherapy. Expert Review of Hematology, 2015; 8 (Suppl 1):S18-S19
3. Grillone F, Gualteri S, Ventura M, et al. Efficacy and tolerability of Sucrosomial® Iron in elderly (≥75 years) patients with solid tumors treated with anticancer agents: a retrospective analysis. Expert Review of Hematology, 2016; 9 (Suppl 1): 28.
4. Romano A, Conticello C, Motta G, et al. Oral Sucrosomial® Iron supplementation in patients affected by Hodgkin lymphoma with mild anemia before chemotherapy: an observational study. Expert Review of Hematology, 2016; 9 (Suppl 1): 30-31.
5. Barni S, Lonati V, Ghilardi M, et al. Sucrosomial® iron for transfusion prevention in cancer patients on chemotherapy. Expert Review of Hematology, 2017; 10 (Suppl 1): 23-24.
6. Sabbatini G, Bonfitto F. Effectiveness of two different dosage regimes of Sideral® forte in anemic patients with solid tumor. Expert Review of Hematology, 2017; 10 (Suppl 1): 24-25.
7. Poyato E, Villacé P, Pujades C, et al. Safety and efficacy of Sucrosomial® iron in cancer patients with anemia. Expert Review of Hematology, 2017; 10 (Suppl 1): 26-27.
8. Monari F, Morgantini AG, Frezza G, et al. Oral Sucrosomial® Iron (Sideral® Forte) supplementation in patients with advanced prostate cancer and bone metastasis treated with 223 radium dichloride. Expert Review of Hematology, 2016; 9 (Suppl 1): 24-25.
9. Barragans M, Camblor M, Cuerda C, et al. Sucrosomial® Iron versus ferrous sulfate for anemia in patients undergoing peritoneal carcinomatosis with cytoreductive surgery and hyperthermic intraperitoneal chemotherapy. Expert Review of Hematology, 2016; 9 (Suppl 1): 22-23.
10. Barzaghi D, Cristiano O, Rlmo M, Guida C. Sucrosomial® Iron and radiotherapy in the neoadjuvant treatment of rectal cancers. Good news for patients? Expert Review of Hematology, 2016; 9 (Suppl 1): 26-27.

**Table S2.** Sucrosomial iron (SI) administration in patients with chronic kidney disease (CKD) (11 studies, 294 patients)

| Author<br>(year) [Ref]<br>Study type             | Patients                                                     | Treatment<br>Compound (Dose)<br>Duration                                                                    | Baseline<br>Hb<br>(g/dL) | Final<br>Hb<br>(g/dL) | Baseline<br>Ferritin<br>(ng/mL) | Final<br>Ferritin<br>(ng/mL) | Baseline<br>TSAT<br>(%) | Final<br>TSAT<br>(%) | GI<br>side<br>effects |
|--------------------------------------------------|--------------------------------------------------------------|-------------------------------------------------------------------------------------------------------------|--------------------------|-----------------------|---------------------------------|------------------------------|-------------------------|----------------------|-----------------------|
| Cuzzola et al.<br>(2016) [1]<br>Case series      | 35 ND-CKD<br>Intolerant<br>to FS                             | SI (30 mg/day)?<br>3 months                                                                                 | 9.3                      | 11.1                  | ---                             | ---                          | 11.2                    | 8.9                  | No                    |
| Dimokvic et al.<br>(2016) [2]<br>Case series     | 31 ND-CKD3-4                                                 | SI (30 mg/day)<br>ESA (no change in dosage)<br>6 months                                                     | 10.2                     | 10.3                  | 213                             | 169                          | 26.8                    | 24.4                 | Mild*                 |
| Arenas et al.<br>(2016) [3]<br>Case series       | 24 ND-CKD3-4                                                 | SI (30 mg/day)<br>6 months                                                                                  | 11.1                     | 12.8                  | 34                              | 75                           | 13.8                    | 26.1                 | No                    |
| Arrizabalaga et al.<br>(2017) [4]<br>Case series | 31 ND-CKD3<br>71% intolerant<br>to conventional oral<br>iron | SI (30 mg/day)<br>12 months                                                                                 | 12.0                     | 11.9                  | 100                             | 116                          | 17.0                    | 18.7                 | 3%                    |
| Griveas et al.<br>(2017) [5]<br>Case series      | 30 ND-CKD3-5                                                 | SI (30 mg/day)?<br>18 months                                                                                | 11.0                     | 11.9                  | 43                              | 99                           | ---                     | ---                  | No                    |
| Griveas et al.<br>(2018) [6]<br>Case series      | 40 ND-CKD3-5                                                 | SI (30 mg/day)?<br>24 months                                                                                | 11.6                     | 12.0                  | 74                              | 66                           | ---                     | ---                  | No                    |
| Equitani et al.<br>(2016) [7]<br>Observational   | 16 ND-CKD<br>Severe anemia                                   | SI (60mg/day)+ ESA (n=8)<br>No iron + ESA (n=8)<br>3 months                                                 | 8.6<br>8.9               | 12.6<br>11.4          | 12<br>21                        | 68<br>21                     | 24<br>28                | 39<br>19             | NO                    |
| Moussa-Abdi et al<br>(2015) [8]<br>Observational | 28 ND-CKD                                                    | SI (60mg/day) (n=14)<br>FS (100 mg/day) (n=14)<br>3 months                                                  | 11.2<br>11.3             | 11.7<br>11.4          | 78<br>182                       | 90<br>228                    | 17.9<br>22.3            | 22.4<br>31.8         | 14%<br>58%            |
| Panichi et al. <sup>#</sup><br>(2015) [9]<br>RCT | 12 HD-CKD                                                    | SI (30-180 mg/week)<br>FG (30-180 mg/week)<br>3 months                                                      | 12.7<br>12.0             | 12.7<br>12.6          | ---<br>---                      | ---<br>---                   | 24.0<br>27.6            | 21.0<br>30.8         | No                    |
| Pistoni et al.<br>(2016) [10]<br>RCT?            | 22 HD-CKD                                                    | SI (360 mg/week)+ESA (n=13)**<br>FG (16-190 mg/week)+ESA (n=9)***<br>3 months                               | 10.7<br>11.1             | 11.4<br>11.4          | 312<br>285                      | 177<br>250                   | 21.6<br>18.6            | 20<br>15.7           | ---                   |
| Cucchiari et al.<br>(2018) [11]<br>Case series   | 25 HD-CKD                                                    | SI (90 mg/week)<br>3 months<br>All patients were previously receiving IV<br>ferric gluconate (62.5 mg/week) | 11.2                     | 11.0                  | 226                             | 97                           | 30                      | 16                   | No                    |

ND, not on dialysis; HD, hemodialysis; FG, ferric gluconate; ESA, erythropoiesis stimulating agent; EPO, erythropoietin; TSAT, transferrin saturation index; GI, gastro-intestinal.

\*More frequently mild dyspeptic symptom and less frequently constipation. <sup>#</sup>Need for EPO 36% with SI vs. 57% with FG. \*\*EPO dose decreased by 2000 IU/week in 38% and increased in 23% of SI patients. \*\*\*EPO dose increased by 2000 IU/week in 67% and decreased in 11% of FG patients.

## References:

1. Cuzzola C, Mancini A, Giancaspro V. Anemia in chronic kidney disease patients: comparison between Sucrosomial® iron and ferrous sulfate. *Expert Review of Hematology* 2016; 9 (Suppl 1): 33.
2. Dimkovic N, Maslarevic Radovic V, Jankovic A, et al. Is liposomal iron good alternative over IV iron for maintenance therapy in CKD patients [SP319]. *Nephrology Dialysis Transplantation* 2016; 31 (Suppl 1): i193–i199,
3. Arenas MD, Herrera AC, Chacón A, Alzate E. Efficacy, tolerance, and adherence to treatment with Sucrosomial® Iron in patients with chronic kidney disease stages 3–4 and iron deficiency. *Expert Review of Hematology* 2016; 9 (Suppl 1): 34-35.
4. Arrizabalaga P. Oral iron treatment with sucrosomial iron in patients with CKD and anemia. V International Multidisciplinary Course on Iron Anemia, Florence, April 2017.
5. Griveas I. Efficacy and tolerability of oral Sucrosomial® iron in CKD patients with anemia. *Expert Review of Hematology* 2017; 10 (Suppl 1): 8-10.
6. Griveas I. Efficacy and tolerability of oral Sucrosomial® iron in CKD patients with anemia and its association with CKD progression parameters. VI International Multidisciplinary Course on Iron Anemia, Lisbon, April 2018.
7. Equitani F. Erythropoietin (EPO) plus oral Sucrosomial® Iron versus EPO alone for the treatment of severe anemia in no end-stage chronic kidney disease. *Expert Review of Hematology* 2016; 9 (Suppl 1): 35-36.
8. Moussa-Abdi F, Alvaredo de Beas F, Velasco –Pilar R, et al. Hierro liposómico oral en ERCA. Experiencia con dos dosis diarias y comparación con sulfato ferroso (P.188). *Nefrología* 2015; 35 (suppl 1):54
9. Panichi V, Scatena A, Digiorgio A, Paoletti S. A randomized trial investigating the effects of oral liposomal iron (Sideral Forte) versus intravenous iron gluconate in CKD hemodialysis patients. *Expert Review of Hematology* 2015;8 (Suppl 1):19
10. Pistoni G, Di Martino M, Veziano E, Saffioti S. Effectiveness of Sucrosomial® Iron (Sideral® Forte) in dialysis patients in therapy with intravenous iron and erythropoietin (EPO). 57º Congresso Nazionale Società Italiana di Nefrologia, Milano, October 2016
11. Cucchiari D. Oral Sucrosomial® iron versus intravenous gluconate iron in hemodialysis patients: Focus on Hb maintenance and oxidative stress. VI International Multidisciplinary Course on Iron Anemia, Lisbon, April 2018.

**Table S3.** Sucrosomial iron (SI) administration in patients with gastrointestinal disease (7 studies, 122 patients)

| Author<br>(year) [Ref]<br>Study type             | Patients                                                | Treatment<br>Compound (Dose)<br>Duration                                    | Baseline<br>Hb<br>(g/dL) | Final<br>Hb<br>(g/dL) | Baseline<br>Ferritin<br>(ng/mL) | Final<br>Ferritin<br>(ng/mL) | Baseline<br>TSAT<br>(%) | Final<br>TSAT<br>(%) | GI<br>side<br>effects |
|--------------------------------------------------|---------------------------------------------------------|-----------------------------------------------------------------------------|--------------------------|-----------------------|---------------------------------|------------------------------|-------------------------|----------------------|-----------------------|
| <b><i>Inflammatory Bowel Disease (IBD)</i></b>   |                                                         |                                                                             |                          |                       |                                 |                              |                         |                      |                       |
| Scarpulla et al.<br>(2016) [1]<br>Case series    | 10 IBD                                                  | SI (30 mg/day)<br>2 months                                                  | 10.5                     | 12.3                  | ≤200                            | ---                          | ≤20                     | ---                  | No                    |
| Stuhlov et al.<br>(2017) [2]<br>Case series      | 6 IBD                                                   | SI (60 mg/day)<br>3 months                                                  | 11.1                     | 12.4                  | 12.4                            | 20.2                         | 8.1                     | 15.7                 | No                    |
| Indriolo et al.<br>(2014) [3]<br>Observational   | 27 IBD                                                  | SI (30 mg/day) (n=7)<br>FS (105 mg/day) (n=8)<br>No iron (n=11)<br>3 months | 10.6<br>10.9<br>11.4     | 12.6<br>12.3<br>11.9  | ---                             | ---                          | ---                     | ---                  | 7.1%<br>12.5%         |
| Romano et al.<br>(2016) [4]<br>Observational     | 12 IBD                                                  | SI (60 mg/day) (n=6)<br>FS (210 mg/day) (n=6)<br>2 months                   | 8.0<br>8.0               | 11.5<br>9.5           | 5<br>6                          | 15<br>9                      | ---                     | ---                  | 50% mild<br>100%      |
| <b><i>Celiac disease /gluten-sensitivity</i></b> |                                                         |                                                                             |                          |                       |                                 |                              |                         |                      |                       |
| Ragozzino et al.<br>(2015) [5]<br>Case series    | 6 Celiac disease<br>28 Non-celiac<br>gluten sensitivity | SI (30 mg/day 15d, 15 mg/day 75d)<br>3 months                               | 8.8<br>9.7               | 11.5<br>12.5          | 13<br>18                        | 23<br>29                     | ---                     | ---                  | ---                   |
| Scorsone et al.<br>(2015) [6]<br>Observational   | 24 Celiac disease<br>All T1DM                           | SI (30 mg/day) (n=12)<br>FS (105 mg/day) (n=12)<br>1 month                  | ?<br>?                   | +1.27<br>+0.82        | ---                             | ---                          | 19.1<br>17.4            | 23.6<br>18.7         | ---                   |
| <b><i>Bariatric surgery</i></b>                  |                                                         |                                                                             |                          |                       |                                 |                              |                         |                      |                       |
| Badiali et al.<br>(2017) [7]<br>Case series      | 9 Bariatric surgery<br>RYGBP                            | SI (30-60 mg/day)<br>3 months                                               | 11.4                     | 12.6                  | 6.7                             | 19.0                         | ---                     | ---                  | No                    |

FS, ferrous sulphate; GI, gastro-intestinal; IS, IV iron sucrose; TSAT, transferrin saturation index; T1DM, type 1 diabetes mellitus

## References:

1. Scarpulla et al. Effectiveness and compliance of oral Sucrosomial® Iron (Sideral® Forte) in asymptomatic inflammatory bowel disease. *Exp Rev Hematol* 2016; 9 (Suppl 1): 32.
2. Stuklov NI, Basiladze IG, Pivnih AV, et al. Sideral® Forte – the first experience of 3 month therapy of anemia in inflammatory bowel diseases. *Exp Rev Hematol* 2017; 10 (Suppl 1): 19-21.
3. Indriolo A, Signorelli S, Greco S, Ravelli P. Comparison between liposomal iron and ferrous sulfate in patients with iron anemia deficiency and inflammatory bowel disease, 20<sup>o</sup> Congresso Nazionales delle Malattie Digestive, Napoli, March 2014.
4. Romano M. Sucrosomial® Iron is effective in correcting inflammatory bowel disease anemia and is more tolerable than sulfate iron. *Exp Rev Hematol* 2016; 9 (Suppl 1): 32-33.
5. Ragozzino g, Riccio A, Mattera E. Effectiveness of oral liposomal iron (Sideral Forte) in patients with intestinal malabsorption (Celiac disease and gluten sensitivity). *Exp Rev Hematol* 2015; 8 (Suppl 1): 21-22.
6. Scorsone A, Calandrino C, Ferranti R, et al. Iron supplementation with liposomal formulation (Sideral Forte) in celiac patients with iron deficiency and Type 1 diabetes mellitus. *Exp Rev Hematol* 2015; 8 (Suppl 1): 19-20.
7. Badiali S, Mozzi E. A protocol for the treatment of iron anemia after bariatric surgery with Sucrosomial® iron. *Exp Rev Hematol* 2017; 10 (Suppl 1): 21-22.

**Table S4.** Sucrosomial iron (SI) administration in cardiology patients (8 studies, 161 patients)

| Author<br>(year)[Ref]<br>Study type           | Patients                                                | Treatment<br>Compound (Dose)<br>Duration                                     | Baseline<br>Hb<br>(g/dL) | Final<br>Hb<br>(g/dL) | Baseline<br>Ferritin<br>(ng/mL) | Final<br>Ferritin<br>(ng/mL) | Baseline<br>TSAT<br>(%) | Final<br>TSAT<br>(%) | GI<br>side<br>effects |
|-----------------------------------------------|---------------------------------------------------------|------------------------------------------------------------------------------|--------------------------|-----------------------|---------------------------------|------------------------------|-------------------------|----------------------|-----------------------|
| <b><i>Congestive heart failure</i></b>        |                                                         |                                                                              |                          |                       |                                 |                              |                         |                      |                       |
| Marazia et al<br>(2017)[1]<br>Case series     | 9 patients with<br>CHF-LVDF<br>(EF ≤39%)                | SI (60 mg/day) *<br>1 month                                                  | 10.3                     | 11.0                  | 32                              | 67                           | ---                     | ----                 | ---                   |
| Putorti et al.<br>(2017)[2]<br>Case series    | 10 patients with<br>Hypertensive<br>heart disease       | SI (60 mg/day)<br>5 weeks                                                    | 10.5                     | 11.5                  | ---                             | ---                          | ---                     | ---                  | No                    |
| Karavidas et al.<br>(2017)[3]<br>Case series  | 10 patients with<br>CHF-LVDF<br>(EF ≤39%)               | SI (30 mg/day)**<br>3 months                                                 | 12.8                     | 13.4                  | 48                              | 102                          | ---                     | ---                  | No                    |
| <b><i>Cardiac surgery</i></b>                 |                                                         |                                                                              |                          |                       |                                 |                              |                         |                      |                       |
| Testa et al.<br>(2017)[4]<br>Case series      | 28 patients after<br>cardiac surgery                    | SI (30 mg/day, months 1 and 3)***<br>3 months                                | 10.0                     | 11.9                  | 334                             | 63                           | ---                     | ---                  | No?                   |
| Grossi et al.<br>(2017)[5]<br>Case series     | 16 patients after<br>cardiac surgery                    | SI (120 mg/day, 7 days)<br>SI (60 mg/day, 14 days)<br>2-3 weeks <sup>#</sup> | 9.7<br>10.0              | 10.2<br>11.0          | ---                             | ---                          | ---                     | ---                  | No                    |
| Buioni et al.<br>(2017)[6]<br>Case series     | 22 patients after<br>cardiac surgery                    | SI (120 mg/day)<br>3 weeks                                                   | 10.0                     | 12                    | ---                             | ---                          | ---                     | ---                  | No                    |
| <b><i>Other interventions</i></b>             |                                                         |                                                                              |                          |                       |                                 |                              |                         |                      |                       |
| Ruperto et al.<br>(2017)[7]<br>Observational  | 50 patients<br>percutaneous<br>coronary<br>intervention | SI (30 mg/day) (n=25)<br>FS (105 mg/day) (n=25)<br>3 months post-PCI         | 8.9<br>9.1               | 11.2<br>11.0          | ---                             | ---                          | ---                     | ---                  | 0%<br>32%             |
| Pagliani et al.<br>(2017)[8]<br>Observational | 16 patients in<br>cardiac<br>rehabilitation             | SI (60 -120 mg/day) (n=8)<br>FS (105 mg/day) (n=8)<br>14 days                | 9.5<br>9.2               | 10.1<br>9.9           | 500<br>600                      | 400<br>870                   | ---                     | ---                  | 0%<br>33%             |

\*BNP and CRP decreased with treatment; \*\*BNP and CRP decreased with treatment, 6MWD increased after treatment, and NYHA improved; \*\*\*BNP and CRP decreased with treatment, 6MWD increased after treatment; <sup>#</sup>6MWD increased after treatment.

## References:

1. Marazia S, Loderi S, Magliari F, et al. Sucrosomial® iron supplementation can be a useful support treatment in patients with heart failure and anemia. *Exp Rev Hematol* 2017; 10 (Suppl 1): 33.
2. Putorti G. Benefits of Sucrosomial® oral iron in patients with heart disease and concomitant iron-deficiency anemia. *Exp Rev Hematol* 2017; 10 (Suppl 1): 37.
3. Karavidas A, Trokanis E, Farmakis D, et al. Oral Sucrosomial® iron in heart failure patients with iron deficiency. *Exp Rev Hematol* 2017; 10 (Suppl 1): 12-13.
4. Testa R, Venturini E, Sansoni C, et al. Oral Sucrosomial® Iron in post cardiac surgery patients. Efficacy and tolerability in a follow up of 3 months. *Exp Rev Hematol* 2017; 10 (Suppl 1): 12-13.
5. Grossi A, Baldari F, Codraro S, et al. Sucrosomial® iron: short-term efficacy compared to administration of 4 capsules/day for 7 days vs. 2 capsules/day for 14 days in post cardiac surgery patients for myocardial revascularization. *Exp Rev Hematol* 2017; 10 (Suppl 1): 31.
6. Buioni D, Nardella S, Maselli D. Effect of Sucrosomial® iron in early time after cardiac surgery. *Exp Rev Hematol* 2017; 10 (Suppl 1): 36-37.
7. Ruperto C, Ricca G, Antonio AA, et al. Oral Sucrosomial® iron supplementation in patients underwent percutaneous coronary intervention: safety, efficacy and tolerability. *Exp Rev Hematol* 2017; 10 (Suppl 1): 33-34.
8. Pagliani L, Payadattil S, Marigo L, et al. Hospital protocol for evaluating effectiveness and timing of use of Sucrosomial® iron in cardiac rehabilitation departments. *Exp Rev Hematol* 2017; 10 (Suppl 1): 35-36.

**Table S5.** Sucrosomial iron (SI) administration in Internal Medicine (10 studies, 236 patients)

| Author<br>(year)[Ref]<br>Study type           | Patients                               | Treatment<br>Compound (Dose)<br>Duration                                                     | Baseline<br>Hb<br>(g/dL) | Final<br>Hb<br>(g/dL) | Baseline<br>Ferritin<br>(ng/mL) | Final<br>Ferritin<br>(ng/mL) | Baseline<br>TSAT<br>(%) | Final<br>TSAT<br>(%) | GI<br>side<br>effects |
|-----------------------------------------------|----------------------------------------|----------------------------------------------------------------------------------------------|--------------------------|-----------------------|---------------------------------|------------------------------|-------------------------|----------------------|-----------------------|
| Alimenti et al<br>(2015)[1]<br>Case series    | 30 IDA various<br>origin               | SI (30 mg/day)?<br>2 month                                                                   | 10.2                     | ??                    | ---                             | ---                          | ---                     | ---                  | 10%                   |
| Campanella et al<br>(2015)[2]<br>Case series  | 16 IDA various<br>origin               | SI (30 mg/day) 40 days<br>SI (30 mg/day) 60 days                                             | 10.0<br>10.8             | 11.9<br>12.6          | <20<br><20                      | ----                         | ----                    | ---                  | No                    |
| Scifo et al<br>(2015)[3]<br>Case series       | 9 hemorrhoidal<br>disease with IDA     | SI (60 mg/day)<br>3 month                                                                    | 9.4                      | 10.8                  | 10                              | 80                           | 18                      | 34                   | No                    |
| Vallerio et al<br>(2016)[4]<br>Case series    | 8 HVC-related<br>cirrhosis             | SI (60 mg/day)*<br>1 month                                                                   | 9.4                      | 10.1                  | 10                              | 36                           | 19                      | 24                   | 10%                   |
| Nasuti et al<br>(2016)[5]<br>Case series      | 30 IDA various<br>origin               | SI (60 mg/day)<br>2 month                                                                    | 9.8                      | 12.1                  | ---                             | ---                          | ---                     | ---                  | 10%                   |
| Nadir et al<br>(2017)[6]<br>Case series       | 4 IDA because of<br>bleeding           | SI (300 mg/day, 10 days + 120 mg/day, 50<br>days)<br>2 month                                 | 9.0                      | 12.5                  | 14.5                            | 103                          | ---                     | ---                  | No                    |
| Svanera et al<br>(2017)[7]<br>Case series     | 3 IDA various<br>origin                | SI (30 mg/day)<br>4 month                                                                    | 7.3                      | 11.3                  | 1.6                             | 87                           | ---                     | ---                  | No                    |
| Berardi et al.<br>(2015)[8]<br>RCT pilot      | 20 MDS with<br>refractory anemia       | SI (14mg/day) + EPO 40,000 IU/week (n=10)<br>No iron + EPO 40,000 IU/week (n=10)<br>3 months | 8.8<br>9.0               | 12.5<br>11.5          | ---                             | ---                          | <20<br><20              | ---                  | No                    |
| Parisi et al.<br>(2016)[9]<br>Observational   | 34 patients with<br>systemic sclerosis | SI (60 mg/day) (n=21)**<br>FS (105 mg/day) (n=22)<br>3 months                                | 10.2<br>10.7             | 13.4<br>11.9          | 130<br>110                      | 240<br>150                   | ---                     | ---                  | 0%<br>23%             |
| Bellodi et al.<br>(2016)[10]<br>Observational | 82 patients with<br>IDA                | SI (30 mg/day)<br>FG or FCM (500 mg) + SI (30 mg/day)<br>6-7 months                          | 10.3<br>8.8              | 11.6<br>12.2          | 7.5<br>5                        | 27.5<br>27                   | ---                     | ---                  | 3.7%                  |

EPO, recombinant erythropoietin; FCM, ferric carboxymaltose; FG, ferric gluconate; FS, ferrous sulphate; GI, gastrointestinal; Hb, haemoglobin; IDA, iron deficiency anaemia; TSAT, transferrin saturation.

\*Reduction of aortic stiffness. \*\* SI treatment reduced ESR and CRP levels.

## References

1. Alimenti M, Della Vida GL, Cipriani L. Tolerability of dietary supplementation with protected liposomal iron (Sideral) in elderly patients with complex clinical and under polypharmacy treatment suffering from iron deficiency anemia of various origins. *Exp Rev Hematol* 2015; 8 (Suppl 1): S25.
2. Campanella MP, Ebbli A, Gaibazzi D, et al. Effectiveness and compliance of oral liposomal iron (Sideral Forte) treatment for iron deficiency anemia: a valid alternative to iv iron therapies. *Exp Rev Hematol* 2015; 8 (Suppl 1): S31-S32.
3. Scifo M. Liposomal iron and ascorbic acid (Sideral Forte) supplementation in the treatment of iron deficiency anemia in patients with hemorrhoidal disease. *Exp Rev Hematol* 2015; 8 (Suppl 1): S21.
4. Vallerio P, Stucchi M, SiricoD, et al. Sucrosomial® Iron and aortic stiffness in cirrhotic patients. *Exp Rev Hematol* 2016; 9 (Suppl 1): 42.
5. Nasuti A, Sagristani M, Sessa F. Oral Sucrosomial® Iron (Sideral® Forte) is effective and well tolerated in elderly patients affected by iron deficiency anemia of various origins. *Exp Rev Hematol* 2016; 9 (Suppl 1): 38-39.
6. Nadir Z. Effectiveness of iron therapy with Sucrosomial® iron (Sideral® Forte) in patients with multifactorial anemia. *Exp Rev Hematol* 2017; 10 (Suppl 1): 37-38.
7. Svanera G. Three different conditions of iron-deficiency anemia treated with oral sucrosomial® iron therapy. *Exp Rev Hematol* 2017; 10 (Suppl 1): 39-40.
8. Berardi D, D'Amico F, Commattee A, et al. Liposomal iron (Sideral®) improves fatigue in patients with myelodysplastic syndromes as refractory anemia. Multicentric study. *Exp Rev Hematol* 2015; 8 (Suppl 1): S26-S27.
9. Parisi S, Bruzzzone M, Scarati M et al. Efficacy of Sucrosomial® Iron (Sideral® Forte) in the treatment of anemia in patients affected by systemic sclerosis. *Exp Rev Hematol*, 2016; 9 (Suppl 1): 21-22.
10. Bellodi A, Molinari E, Genova C, et al. Retrospective evaluation of iron deficiency patients in a Northwestern Italy anemia ambulatory: experience with Sucrosomial® Iron. *Exp Rev Hematol* 2016; 9 (Suppl 1): 29.
